# Supplementary material for: Direct hydrogenation of CO2 to ethanol at ambient conditions using Cu(i)-MOF in a dielectric barrier discharge plasma reactor
Source: Royal Society of Chemistry journal article supplement (doi:10.1039/d3ta00314k), 2023-01-01
Supplement: d3ta00314k1.pdf [file d3ta00314k1.pdf]

*Supplementary Material for*

**Direct Hydrogenation of CO<sub>2</sub> to Ethanol at Ambient Conditions  
using Cu(I)-MOF in a Dielectric Barrier Discharge Plasma Reactor**

Nan Zou<sup>a,b,c</sup>, Jie Chen<sup>a,c</sup>, Ting Qiu<sup>a,c</sup><sup>1</sup>, Ying Zheng<sup>b</sup><sup>2</sup>

<sup>a</sup> *College of Chemical Engineering, Fuzhou University, Fuzhou 350108, Fujian, P.R. China.*

<sup>b</sup> *Department of Chemical and Biochemical Engineering, Western University, London, ON N6A 3K7, Canada*

<sup>c</sup> *Engineering Research Center of Reactive Distillation, Fujian Province Higher Education Institutes.*

\

<sup>1</sup> Corresponding authors. E-mail addresses: [tingqiu@fzu.edu.cn](mailto:tingqiu@fzu.edu.cn)

<sup>2</sup> Corresponding authors. E-mail addresses: [ying.zheng@uwo.ca](mailto:ying.zheng@uwo.ca)

## SECTION S1 SUPPLEMENTARY METHODS

### Catalyst Characterization

The optical microscope images were photographed via the Nikon FASTCAM SA1.1. The N<sub>2</sub> adsorption-desorption isotherms and the heat of CO<sub>2</sub> adsorption was analyzed using ASAP2020 Plus physisorption. The thermal stability of Cu(I)-HKUST-n were evaluated through the thermogravimetry (TG) detection of the Netzsch STA449C. The surface morphology (SEM) was detected using the Hitachi S-4800 model device. X-ray diffraction (XRD) patterns of catalysts were obtained via the Bruker D8 Advance diffractometer equipped with CuK $\alpha$  radiation in the 2 $\theta$  range from 3° to 60°.

### Parameter Definition

The carbon (in mol) of all the gaseous products (including unreacted CO<sub>2</sub>) was quantified using a flow meter and a fully calibrated GC for 2 hours. The carbon (in mol) of liquid products collected in the same 2-hour period were determined using GC analysis. The sum of the carbon (in mol) of the liquid products and gaseous products is then compared to the carbon of the CO<sub>2</sub> fed to the reactor. A sample calculation of carbon balance is shown in **Table S1**. The experimental errors mainly include the analysis of the product by GC and the collection of the liquid product by the cold trap.

The conversion of CO<sub>2</sub> is defined as

$$X_{CO_2}(\%) = \frac{\text{Carbon of } CO_2 \text{ converted (mol)}}{\text{Carbon of initial } CO_2 \text{ (mol)}} \times 100 \quad (1)$$

The selectivity of products can be calculated as

$$S_{CO}(\%) = \frac{\text{Carbon of } CO \text{ produced (mol)}}{\text{Carbon of } CO_2 \text{ converted (mol)}} \times 100 \quad (2)$$

$$S_{CH_4}(\%) = \frac{\text{Carbon of } CH_4 \text{ produced (mol)}}{\text{Carbon of } CO_2 \text{ converted (mol)}} \times 100 \quad (3)$$

The selectivity of **one** liquid product ( $C_xH_yO_z$ ) can be calculated as

$$S_{C_xH_yO_z}(\%) = \frac{\text{Carbon of } C_xH_yO_z \text{ (mol)}}{\text{Carbon of } CO_2 \text{ converted (mol)}} \times 100 \quad (4)$$

The yield of  $C_xH_yO_z$  can be calculated as

$$Y_{C_xH_yO_z}(\%) = \frac{\text{Carbon of } C_xH_yO_z \text{ (mol)}}{\text{Carbon of initial } CO_2 \text{ (mol)}} \times 100 \quad (5)$$

The space-time yield of ethanol (EtOH) can be calculated as

$$STY_{EtOH} (g_{EtOH} h^{-1} g_{cat.}^{-1}) = \frac{\text{Ethanol production (g)}}{\text{Reaction time (h)} \times \text{amount of catalyst (g)}} \quad (6)$$

The energy efficiency for  $CO_2$  conversion can be calculated as

$$EE_{CO_2} (mmol kJ^{-1}) = \frac{\text{CO}_2 \text{ consumed (mmol)}}{\text{Power (kJ)}} \quad (7)$$

The volume power density can be calculated as

$$VPD (W cm^{-3}) = \frac{\text{Output Power (W)}}{\text{Discharge zone volume (cm}^3\text{)}} \quad (8)$$

The volume space velocity can be calculated as

$$SV (min^{-1}) = \frac{\text{The volumetric flow rate of the reactants (cm}^3 \text{ min}^{-1}\text{)}}{\text{The volume of the reactor (cm}^3\text{)}} \quad (9)$$

The carbon balance can be calculated as

$$C_B(\%) = \frac{\text{Carbon of unreacted } CO_2 \text{ and production (mol)}}{\text{Carbon of initial } CO_2 \text{ (mol)}} \times 100 \quad (10)$$

**Table S1.** Carbon balance data of Cu(I)-HKUST-17.5 applied in plasma-assisted  $CO_2$  hydrogenation

| Input carbon<br>(mmol) | Output carbon        |      |                     |      |
|------------------------|----------------------|------|---------------------|------|
|                        | Gaseous phase (mmol) |      | Liquid phase (mmol) |      |
| 40.0                   | Unreacted $CO_2$     | 23.5 | Produced MeOH*      | 2.02 |
|                        | Produced $CH_4$      | 0.54 | Produced EtOH*      | 9.33 |
|                        | Produced CO          | 2.85 | Produced IPA*       | 0.41 |

---

$$\text{Carbon Balance (\%)} = \text{Output carbon} / \text{Input carbon} \times 100 = 96.6\%$$

---

\* MeOH, EtOH and IPA are abbreviations for methanol, ethanol and isopropanol, respectively.

## SECTION S2 SUPPLEMENTARY FIGURES

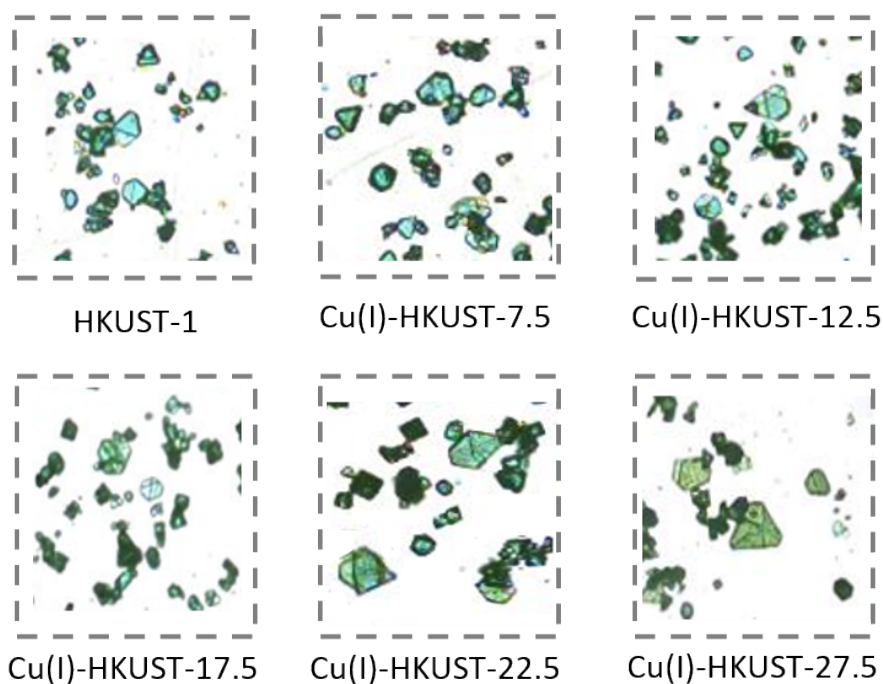

**Figure S1.** Optical microscope image of HKUST-1 and Cu(I)-HKUST-n

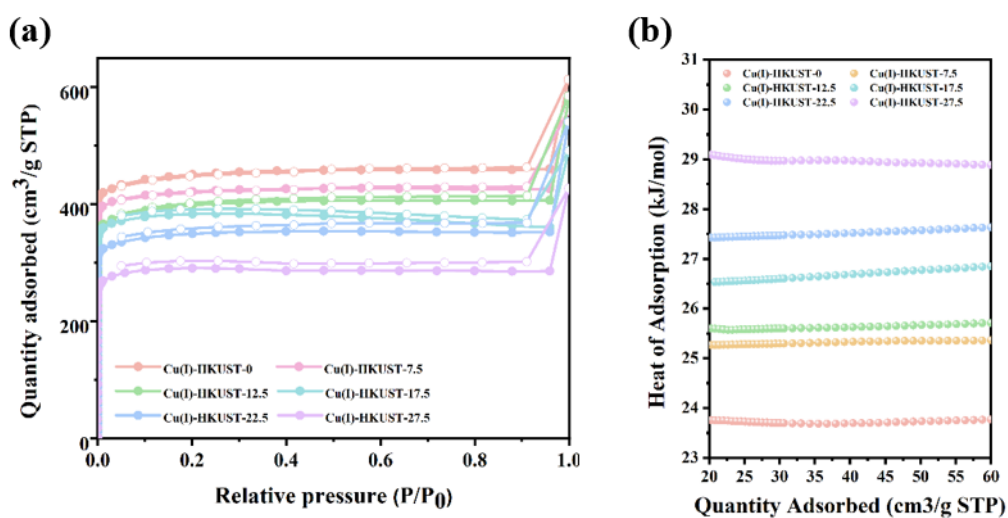

**Figure S2.** (a) N<sub>2</sub> adsorption-desorption isotherms and (b) CO<sub>2</sub> heat of adsorption of HKUST-1 and Cu(I)-HKUST-n

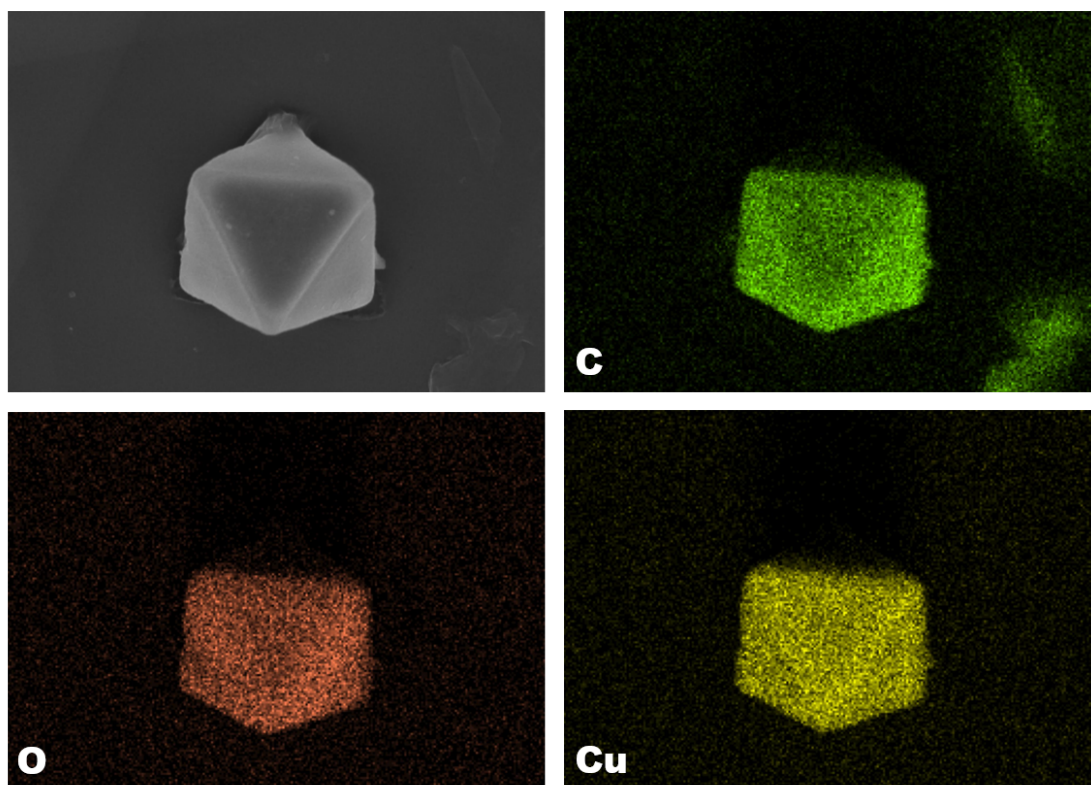

**Figure S3.** EDS mappings of C, O and Cu elements of Cu(I)-HKUST-17.5.

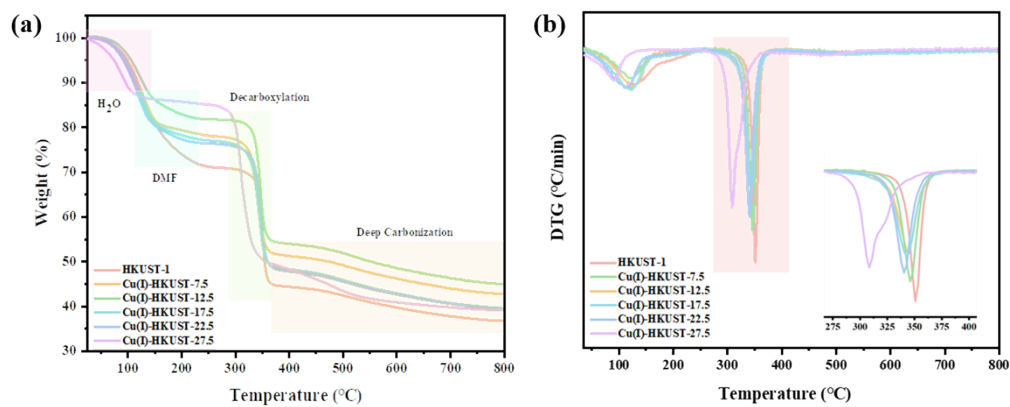

**Figure S4.** TG (a) and DTG (b) curve of HKUST-1 and Cu(I)-HKUST-n

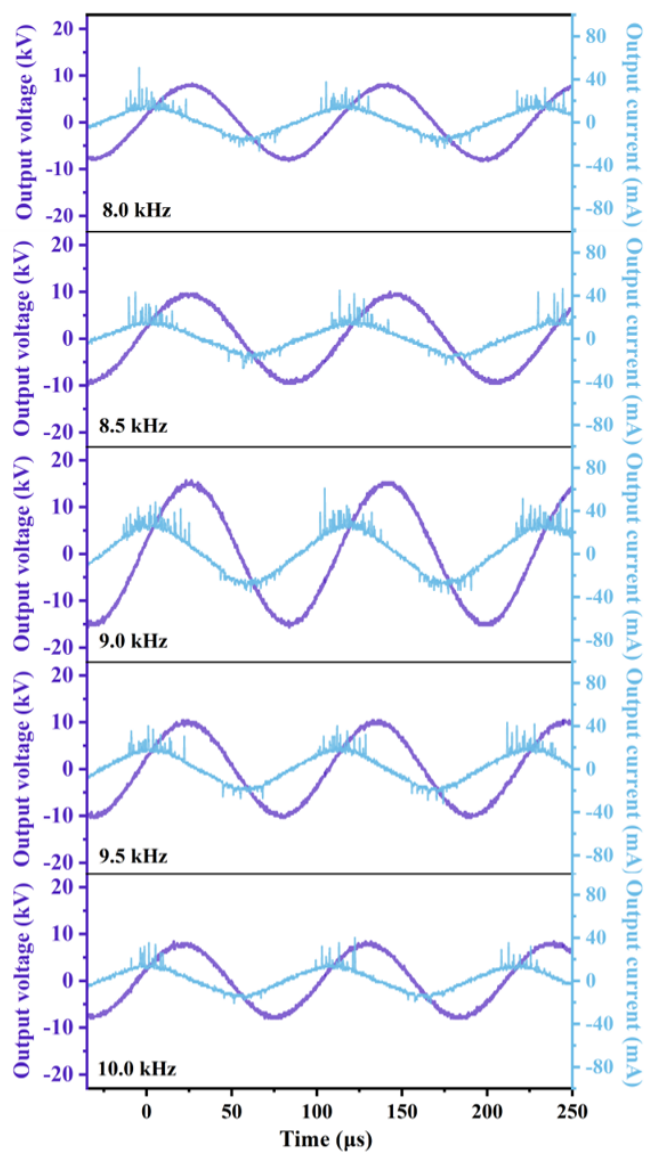

**Figure S5.** Output voltage and discharge current at different frequencies

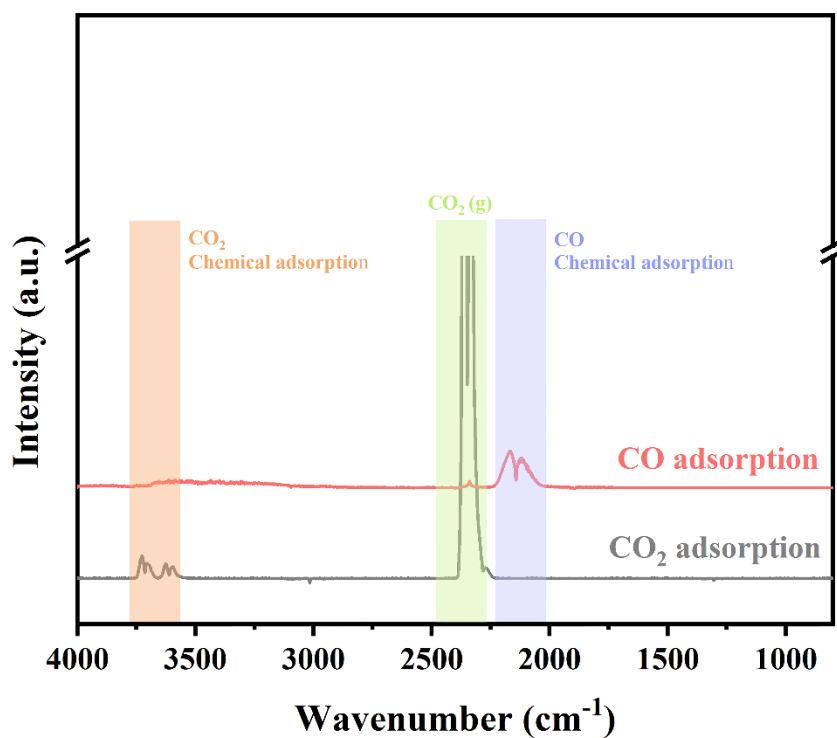

Figure S6. DRIFTS spectra of CO<sub>2</sub> and CO adsorption on Cu(I)-HKUST-17.5

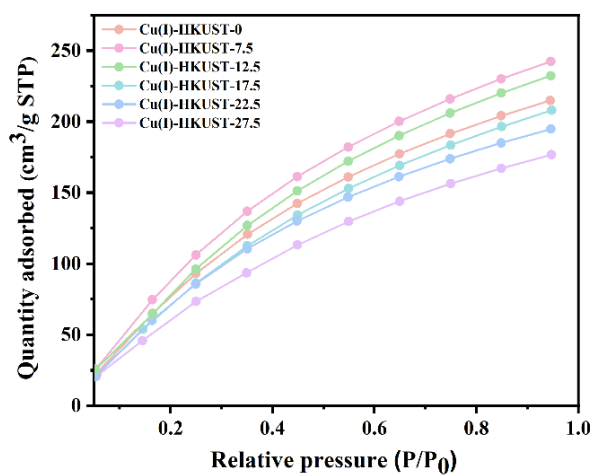

Figure S7. CO<sub>2</sub> adsorption-desorption isotherms of HKUST-1 and Cu(I)-HKUST-n

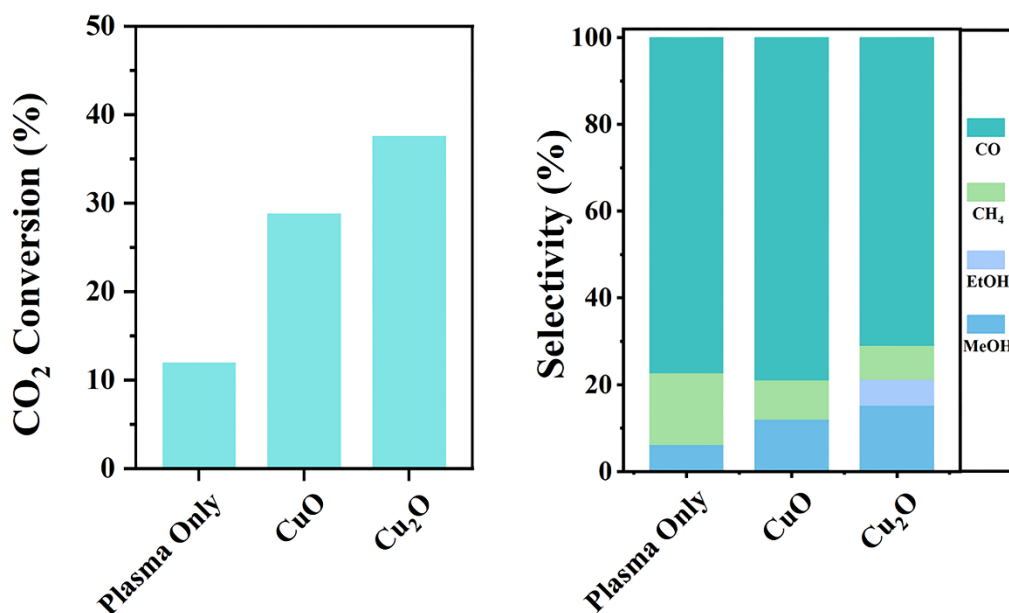

**Figure S8.** (a) CO<sub>2</sub> conversion and (b) selectivity of NTP-assisted CO<sub>2</sub> hydrogenation over CuO and Cu<sub>2</sub>O catalyst. Reaction condition: 35°C, atmospheric pressure, a volume space velocity of 3.53 min<sup>-1</sup>, a H<sub>2</sub>/CO<sub>2</sub> flow ratio of 3:1, an input voltage of 30 V and reaction time of 2 hours. The amounts of CuO and Cu<sub>2</sub>O were determined based on the molar amounts of copper ions on HKUST-1, which were 18.3 and 16.5 mg, respectively. For maintaining the same packing volume, CuO and Cu<sub>2</sub>O were mixed with 6 μm glass beads, respectively.

**Table S2** The CO<sub>2</sub> conversion, the selectivity of gaseous products and liquid products for NTP-assisted CO<sub>2</sub> hydrogenation over different catalysts. Reaction condition: 35°C, atmospheric pressure, a volume space velocity of 3.53 min<sup>-1</sup>, a H<sub>2</sub>/CO<sub>2</sub> flow ratio of 3:1, an input voltage of 30 V and reaction time of 2 hours.

|                  | X <sub>CO2</sub><br>(%) | S <sub>Gaseous products</sub><br>(%) | S <sub>Liquid products</sub><br>(%) |
|------------------|-------------------------|--------------------------------------|-------------------------------------|
| Plasma Only      | 11.9                    | 93.3                                 | 6.10                                |
| HKUST-1          | 32.3                    | 69.8                                 | 30.2                                |
| Zeolite-A        | 27.7                    | 89.4                                 | 10.6                                |
| Cu(II)@zeolite-A | 30.2                    | 81.3                                 | 18.7                                |
